# Supplementary material
Source: Research Square preprint supplement (doi:10.21203/rs.3.rs-8174899/v1)
Supplement: Supplementary file 1 [file 6b2ef9cef46b3dfeb7380269.docx]

**Multimedia Appendix 1**

**Large Language Model Prompt**

**Objective**

To derive structured, sector-specific variables from unstructured text for use in predicting the outcomes of digital-health companies.

**Source Texts**

For each company, the following unstructured fields were used:

- Company description
- Industry and sub-industry tags
- Public website text (when available)

**Prompt**

*You are an expert analyst of digital-health ventures.
From the description below, extract the following attributes strictly from the text; do not speculate.
Use only the label values provided.
If the text does not contain evidence, return "Unknown".*

***Attributes to extract***

1. ***Digital-health-technology (DHT) category****– choose one:*

*Please identify the primary category that best describes the company’s core digital health technology. Select one option that reflects the principal purpose and function of the product or solution:*

*Answer by: {Digital Therapeutic, Patient Monitoring, Digital Diagnostics, Care Support, Health and Wellness, Health System Clinical Software, Health System Operational Software, Non-Health System Software / Digital Health Solution}.*

1. ***DHT investor tier****– classify digital health investor-syndicate quality:*

*Assess and classify the quality and reputation of the investor syndicate that has backed the company. Use the categories below to reflect the investor group’s typical influence, track record, and experience in digital health:*

*Answer by: {Tier 1 (top-tier, established investors with strong healthcare track record), Tier 2 (experienced but mid-tier investors or mixed-quality syndicate), Tier 3 (limited experience or low-profile investors), Unknown (insufficient information)}.*

1. ***Peer-reviewed publications****– does the company reference peer-reviewed clinical evidence?*

*Determine whether the company explicitly references peer-reviewed clinical publications that support its product’s efficacy, safety, or real-world performance. Consider both company materials and publicly available evidence.*

*Answer by: {Yes (clear reference to peer-reviewed publications), No (no reference found), Unknown (information not available or ambiguous)}.*

1. ***Reimbursement eligibility – DTx****– is the product type likely eligible for national DTx reimbursement programs (e.g., Germany DiGA)?*

*Assess whether the product meets the typical criteria for inclusion in national digital therapeutic reimbursement schemes (e.g., Germany’s DiGA framework). Consider whether the solution is therapeutic in nature, has clinical evidence, and aligns with regulatory definitions of a DTx.*

*Answer by: {Yes, No, Unknown}.*

1. ***Reimbursement eligibility – general DHT****– is the product type likely reimbursable under existing health-system codes?*

*Evaluate whether the product is likely to be reimbursable under existing healthcare payment or coding systems, even if not classified as a digital therapeutic. Consider its clinical role, integration into care pathways, and alignment with reimbursable digital health categories.*

*Answer by: {Yes, No, Unknown}.*

***System rule:*** *“Before finalizing, verify that classifications align with the company’s stated product and customer base. Do not infer beyond evidence in text.”*
