# Supplementary material
Source: Research Square preprint supplement (doi:10.21203/rs.3.rs-8174899/v1)
Supplement: Supplementary file 2 [file f54ff3d0f490d9f59484b1a8.docx]

**Multimedia Appendix 2: Company Profiles**

Company A

**General Info**

Headquarters country: Spain

Headquarters city: Barcelona

Year founded: 2017

Business model: B2B2C

Revenue model: tech-enabled services

Digital health category: care support

Customers: patients

**Description**

Developer of an e-healthcare application designed to offer doctor and patient communication. The company's application offers medical insurance and personalized medical services which can be availed via chat, phone call, or video conference, enabling patients to receive treatment quickly and conveniently, for any medical questions at any time of the day.

**Financials**

Revenue (LFY): $6.7mE

Revenue growth: n.a.

EBITDA (LFY): n.a.

EBITDA growth (LFY): n.a.

**Financing**

| **Deal class** | **Date** | **Amount** |
| --- | --- | --- |
| Early-stage VC | Apr. 2021 | $0.6m |
| Early-stage VC | Jul. 2020 | $7.0m |
| Seed | Jul. 2018 | $1.2m |

Number of investors: 7

DHT investor syndicate tier: tier 1

**Employees**

Number of employees (LFY): 37

Employee number growth (LFY): -30%

Founder(s) highest degree: MBA

Founder(s) previous experience: 20+ years in e-commerce and logistics

**Healthcare-specific and IP**

Clinical trials: no

UCC filings: 0

Digital health reimbursement: yes

Number of patents: 22

Company B

**General Info**

Headquarters country: United States

Headquarters city: New York, NY

Year founded: 2012

Business model: B2B

Revenue model: software as a service

Digital health category: health system clinical software

Customers: hospitals, physician groups, diagnostic imaging centers, and other healthcare providers

**Description**

Developer of an online patient engagement platform designed to schedule medical appointments for patients, physicians and staff. The company's software as a service platform is fully integrated and is available for the full range of medical specialties, family medicine, diagnostic imaging, real-time scheduling, registration and payments, enabling patients to have real-time access to healthcare services.

**Financials**

Revenue (LFY): $3.1m

Revenue growth (LFY): n.a.

EBITDA (LFY): n.a.

EBITDA growth (LFY): n.a.

**Financing**

| **Deal class** | **Date** | **Amount** |
| --- | --- | --- |
| Early-stage VC | Apr. 2017 | n.a. |
| Seed | Dec. 2014 | $5.0m |

Number of investors: 4

DHT investor syndicate tier: tier 1

**Employees**

Number of employees (LFY): 33

Employee number growth (LFY): 17%

Founder(s) highest degree: BS in Finance

Founder(s) previous experience: 10+ years in brand marketing

**Healthcare-specific and IP**

Clinical trials: 0

UCC filings: 0

Digital health reimbursement: no (provider-driven engagement tool, not a reimbursed clinical service)

Number of patents: 1

Company C

**General Info**

Headquarters country: United Kingdom

Headquarters city: London

Year founded: 2017

Business model: B2B

Revenue model: software as a service

Digital health category: health and wellness

Customers: corporates, employers, and organizations seeking to measure and improve employee mental well-being

**Description**

Developer of a mental well-being measurement platform designed to help organizations assess, understand, and improve the mental well-being of their staff. The company’s platform combined assessments, data analytics, and personalized tools to help employees build healthy daily habits, while providing organizations with insights to target resources effectively. Leveraging AI and behavioral science, the company positions itself as a workplace mental health partner for both preventive and ongoing support

**Financials**

Revenue (LFY): <$5mE

Revenue growth (LFY): n.a.

EBITDA (LFY): n.a.

EBITDA growth (LFY): n.a.

**Financing**

| **Deal class** | **Date** | **Amount** |
| --- | --- | --- |
| Early-stage VC | Jul. 2021 | $2.6m |
| Early-stage VC | Oct. 2020 | $0.5m |
| Early-stage VC | Aug. 2019 | $1.0m |
| Angel | Apr. 2018 | $1.0m |

Number of investors: 3

DHT investor syndicate tier: tier 3

**Employees**

Number of employees (LFY): 31

Employee number growth (LFY): -8%

Founder(s) highest degree: MBA

Founder(s) previous experience: 25+ years in corporate leadership

**Healthcare-specific and IP**

Clinical trials: 0

UCC filings: 0

Digital health reimbursement: no, health and wellness is not reimbursed

Number of patents: 0

Company D

**General Info**

Headquarters country: United States

Headquarters city: Eden Prairie, MN

Year founded: 2009

Business model: B2B

Revenue model: software as a service

Digital health category: health system clinical software

Customers: hospitals, imaging centers, life sciences companies, and other healthcare organizations

**Description**

The company is a healthcare software company specializing in secure medical imaging data access, management, and exchange. Its flagship platform curates regulatory-grade Imaging Real World Data that matches life sciences partners’ case selection protocols, enabling more precise research, regulatory submissions, and evidence generation. The company’s solutions integrate with healthcare provider systems to allow direct access to clinical images and associated patient records, streamlining workflows for clinical trials, diagnostics, and population health initiatives

**Financials**

Revenue (LFY): $1.5m

Revenue growth (LFY): 0%

EBITDA (LFY): <$0m

EBITDA growth (LFY): n.a.

**Financing**

| **Deal class** | **Date** | **Amount** |
| --- | --- | --- |
| Later-stage VC | Jun. 2022 | $0.0m |
| Later-stage VC | Dec. 2018 | $6.5m |
| Early-stage VC | Jan. 2011 | $8.0m |

Number of investors: 7

DHT investor syndicate tier: tier 1

**Employees**

Number of employees (LFY): 22

Employee number growth (LFY): 0%

Founder(s) highest degree: MD

Founder(s) previous experience: 20+ years in radiology and health IT

**Healthcare-specific and IP**

Clinical trials: 0

UCC filings: 0

Digital health reimbursement:

not applicable (data services for providers and life sciences)

Number of patents: 26

Company E

**General Info**

Headquarters country: Germany

Headquarters city: Hamburg

Year founded: 2016

Business model: B2C and B2B2C

Revenue model: software as a service

Digital health category: patient monitoring

Customers: patients with chronic digestive disorders

**Description**

The company offers a virtual health advising application designed to help individuals manage chronic digestive disorders such as IBS, IBD, GERD, and food intolerances. The platform offers symptom tracking, dietary logging, and personalized insights, enabling patients to identify health patterns, adjust lifestyle habits, and improve long-term outcomes. By combining behavioral science, nutrition guidance, and medical expertise, the company delivers a data-driven, patient-centered approach to digestive health management

**Financials**

Revenue (LFY): <$5mE

Revenue growth (LFY): n.a.

EBITDA (LFY): n.a.

EBITDA growth (LFY): n.a.

**Financing**

| **Deal class** | **Date** | **Amount** |
| --- | --- | --- |
| Early-stage VC | Jun. 2020 | $10.2m |
| Seed | Sep. 2017 | $2.0m |

Number of investors: 11

DHT investor syndicate tier: tier 2

**Employees**

Number of employees (LFY): 37

Employee number growth (LFY): 0%

Founder(s) highest degree: MD, PhD

Founder(s) previous experience: 3+ years in software development

**Healthcare-specific and IP**

Clinical trials: no

UCC filings: 0

Digital health reimbursement: yes

Number of patents: 0

Company F

**General Info**

Headquarters country: United States

Headquarters city: Burlington, MA

Year founded: 2016

Business model: B2B

Revenue model: software as a service

Digital health category: care support

Customers: healthcare providers, clinics, telehealth platforms, pharmacies

**Description**

The company developed a HIPAA-compliant text- and photo-based chat platform designed to connect patients directly with licensed nurses for real-time guidance. The service helps engage patients early in their illness journey, reduce reliance on potentially unreliable online health information, and guide them toward appropriate care pathways. By improving patient experience, reducing clinic load, and enhancing operational efficiency, the platform serves as a trusted front door to healthcare for providers, pharmacies, and health systems

**Financials**

Revenue (LFY): <$5mE

Revenue growth (LFY): n.a.

EBITDA (LFY): n.a.

EBITDA growth (LFY): n.a.

**Financing**

| **Deal class** | **Date** | **Amount** |
| --- | --- | --- |
| Early-stage VC | Feb. 2022 | $2.3m |
| Seed | Oct. 2018 | $1.2m |

Number of investors: 16

DHT investor syndicate tier: tier 1

**Employees**

Number of employees (LFY): 23

Employee number growth (LFY): +20%

Founder(s) highest degree: MSc

Founder(s) previous experience: 10+ years entrepreneurship

**Healthcare-specific and IP**

Clinical trials: no

UCC filings: 0

Digital health reimbursement: no (provider-driven engagement tool, not a reimbursed clinical service)

Number of patents: 0

Company G

**General Info**

Headquarters country: United States

Headquarters city: The Woodlands, TX

Year founded: 2013

Business model: B2B

Revenue model: software as a service + implementation fee

Digital health category: digital diagnostics

Customers: healthcare providers, hospital systems, administrators, health plans

**Description**

Developer of a provider-centric data management platform designed to connect stakeholders across healthcare ecosystems. Its technology streamlines the collection, maintenance, and management of key provider data used for onboarding, credentialing, health plan enrollment, billing, claims payment, website directories, analytics, and other administrative processes

**Financials**

Revenue (LFY): $5.3mE

Revenue growth (LFY): n.a.

EBITDA (LFY): n.a.

EBITDA growth (LFY): n.a.

**Financing**

Number of investors: 0

**Employees**

Number of employees (LFY): 26

Employee number growth (LFY): 0%

Founder(s) highest degree: PhD, MBA

Founder(s) previous experience: 30+ years in healthcare leadership and innovation

**Healthcare-specific and IP**

Clinical trials: no

UCC filings: 0

Digital health reimbursement: no (administrative platform, non-clinical)

Number of patents: 0

Company H

**General Info**

Headquarters country: United States

Headquarters city: San Francisco

Year founded: 2011

Business model: B2B

Revenue model: software as a service

Digital health category: care support

Customers: healthcare providers

**Description**

Developer of a digital health platform intended to enhance monitoring using care plans. The company converts clinical protocols into care plans that patients can understand while also offering a follow-up plan taking into account more than just the disease, but also lifestyle habits, thereby enabling healthcare professionals to provide personalized treatment to all their patients

**Financials**

Revenue (LFY): <$5mE

Revenue growth (LFY): n.a.

EBITDA (LFY): n.a.

EBITDA growth (LFY): n.a.

**Financing**

| **Deal class** | **Date** | **Amount** |
| --- | --- | --- |
| Later-stage VC | Apr. 2020 | $0.1m |
| Early-stage VC | Jul. 2015 | $2.0 |
| Seed | Dec. 2012 | $0.3m |
| Seed | Dec. 2011 | $0.1m |

Number of investors: 12

**Employees**

Number of employees (LFY): 24

Employee number growth (LFY): n.a.

Founder(s) highest degree: MSc

Founder(s) previous experience: founding experience (company was acquired)

**Healthcare-specific and IP**

Clinical trials: 2

UCC filings: 0

Digital health reimbursement: not relevant

Number of patents: 0

DHT investor syndicate tier: tier 1

## List of Abbreviations

- AI – Artificial Intelligence
- Angel – Angel Investment (individual early-stage funding)
- B2B – Business to Business
- B2B2C – Business to Business to Consumer
- B2C – Business to Consumer
- BS – Bachelor of Science
- DHT – Digital Health Technology
- EBITDA – Earnings Before Interest, Taxes, Depreciation, and Amortization
- E – Estimated
- Early-stage VC – Early-stage Venture Capital round
- HIPAA – Health Insurance Portability and Accountability Act (US regulation for patient data privacy/security)
- IP – Intellectual Property
- Later-stage VC – Later-stage Venture Capital round
- LFY – Last Fiscal Year before Exit Event
- MBA – Master of Business Administration
- MD – Doctor of Medicine
- MSc – Master of Science
- n.a. – Not Available
- PhD – Doctor of Philosophy
- Seed – Seed Funding (early-stage investment)
- UCC – Uniform Commercial Code (legal filings)
- VC – Venture Capital
